# Supplementary material
Source: publisher figshare collection journal article supplement (https://gsapubs.figshare.com/articles/dataset/_/15078945)
Supplement: Supplementary file 1 [file 1]

## Sheet: Cismon Bulk
Stratigraphic Interval (m)	[Sc] (ppm)	[Al] (ppm)	[Mn] (ppm)	Mn/Al x 102	MnEF (Al shale normalized)	Mn/Sc	MnEF (Sc shale normalized)	[Cr] (ppm)	Cr/Al x 103	Cr/Sc	Crauthigenic (Al corrected)	fauthigenic (Al corrected)	Crauthigenic (Sc corrected)	fauthigenic (Sc corrected)	δ53Cr (‰) - Uncorrected	δ53Cr (‰) - Detrital Cr (Al Corrected)	δ53Cr (‰) - Detrital Cr (Sc Corrected)	2se (‰)	Y (ppm)	La (ppm)	La SN	Ce (ppm)	Ce SN	Pr (ppm)	Pr SN	Nd (ppm)	Nd SN	Sm (ppm)	Sm SN	Eu (ppm)	Eu SN	Gd (ppm)	Gd SN	Tb (ppm)	Tb SN	Dy (ppm)	Dy SN	Ho (ppm)	Ho SN	Er (ppm)	Er SN	Tm (ppm)	Tm SN	Yb (ppm)	Yb SN	Lu (ppm)	Lu SN	ΣlREE	ΣmREE
11.8628	2.77526	13661.6	465.64	3.40838	3.52867	167.782	2.56608	34	24.8872	12.2511	20.0242	0.588946	14.7869	0.434908	-0.108938	-0.0984305	-0.0932657	0.08	13.4528	11.7181	0.306757	10.2181	0.128368	2.63519	0.298436	11.0898	0.327132	2.26245	0.407648	0.586452	0.543011	2.4444	0.524548	0.392909	0.507635	2.22406	0.475226	0.459311	0.463482	1.27137	0.446096	0.175599	0.433578	1.15691	0.410251	0.161153	0.372178	0.310775	0.491614
13.1778
15.7887	4.89629	22537.1	573.905	2.54649	2.63636	117.212	1.79266	92.7	41.1322	18.9327	69.6445	0.75129	58.803	0.634336	0.0279262	0.0782027	0.113775	0.06	19.0151	18.8102	0.492412	19.3085	0.242569	4.89034	0.553832	19.9659	0.588965	4.4788	0.806991	1.10673	1.02475	5.12162	1.09906	0.643711	0.831667	3.78298	0.808328	0.71652	0.723027	2.04249	0.716664	0.2864	0.707161	1.84697	0.654954	0.246005	0.568141	0.54507	0.914159
16.8104	4.88421	25593.2	306.741	1.19853	1.24083	62.8027	0.960512	122.9	48.0206	25.1627	96.7182	0.786966	89.0866	0.724871	-0.0468931	-0.0260271	-0.0187654	0.05	21.6228	21.0476	0.550983	25.7211	0.32313	5.34295	0.605091	24.2669	0.715837	5.0653	0.912667	1.21978	1.12943	5.47117	1.17407	0.704109	0.909701	4.08269	0.872369	0.853995	0.861751	2.15635	0.756615	0.298469	0.73696	1.98496	0.703887	0.295525	0.682506	0.62397	0.999647
17.35
18.66
18.87	2.68136	10973.5	199.702	1.81986	1.88409	74.4778	1.13907	48.7	44.3796	18.1624	37.4741	0.769489	30.1369	0.618828	-0.118051	-0.116269	-0.116234	0.04	9.49673	10.3955	0.272134	11.0897	0.139318	2.29661	0.260092	10.1356	0.298986	2.10181	0.378705	0.50229	0.465083	2.36062	0.506571	0.267022	0.34499	1.67352	0.357591	0.330595	0.333597	0.996523	0.349657	0.112541	0.277878	0.842466	0.298747	0.14021	0.32381	0.277071	0.410588
19.29	5.61517	28626	186.145	0.650267	0.673217	33.1504	0.507006	216.2	75.5258	38.5029	186.916	0.86455	177.326	0.820195	0.140011	0.181362	0.197231	0.05	39.2317	31.9204	0.835614	35.5362	0.446434	7.73831	0.876366	33.5189	0.988758	7.27284	1.31042	1.69832	1.57252	7.99086	1.71478	1.12241	1.45014	6.7029	1.43224	1.34354	1.35574	3.67414	1.28917	0.4979	1.22938	2.83603	1.00568	0.418971	0.9676	0.900246	1.49602
19.5	7.82021	38181.4	166.573	0.436268	0.451665	21.3003	0.32577	214.6	56.2053	27.4417	175.54	0.817989	160.461	0.74772	0.209609	0.283816	0.321156	0.04	29.2614	27.5749	0.721857	36.2362	0.455229	6.63079	0.750939	30.4332	0.897734	6.38658	1.15074	1.40803	1.30373	6.71853	1.44175	0.911034	1.17705	5.16604	1.10385	1.05322	1.06278	3.01801	1.05895	0.379546	0.937152	2.41098	0.854959	0.323614	0.747376	0.790177	1.23542
19.87	7.39471	35047.2	179.18	0.511255	0.5293	24.2309	0.37059	321.1	91.6194	43.423	285.247	0.888342	269.906	0.840568	0.149231	0.183564	0.200486	0.03	41.8094	35.6704	0.933779	45.7301	0.574499	8.89202	1.00702	39.45	1.16372	8.39096	1.51188	1.97313	1.82697	8.30872	1.78299	1.27624	1.64888	6.89625	1.47356	1.43163	1.44463	3.99839	1.40295	0.5023	1.24025	3.04765	1.08073	0.442247	1.02136	1.03484	1.64886
20.32	6.44984	34180.6	130.399	0.381498	0.394963	20.2173	0.309206	325.4	95.2002	50.4509	290.433	0.892542	280.748	0.862777	0.281826	0.330671	0.345895	0.04	19.8035	20.3516	0.532764	28.2796	0.355272	4.91414	0.556528	21.9428	0.647281	4.23082	0.762309	1.00223	0.927988	4.46131	0.957363	0.600513	0.775857	3.45411	0.738059	0.701633	0.708005	2.235	0.784211	0.298042	0.735905	1.8075	0.640956	0.248982	0.575016	0.578858	0.832315
21.59	7.45908	38592.3	182.056	0.471743	0.488392	24.4073	0.373289	185.3	48.0148	24.8422	145.82	0.786941	133.661	0.721321	0.0879918	0.145368	0.168735	0.05	22.535	22.2319	0.581986	31.2001	0.391961	5.53142	0.626435	25.7251	0.758852	5.16035	0.929793	1.09185	1.01097	4.99575	1.07205	0.711451	0.919187	4.10991	0.878185	0.824666	0.832156	2.44262	0.857059	0.333781	0.824151	2.14051	0.759047	0.277309	0.640437	0.655758	0.962037
21.9	5.08739	31086.5	196.379	0.631717	0.654013	38.601	0.590369	136.3	43.8454	26.7917	104.499	0.76668	101.08	0.741599	-0.0274641	0.001904	0.00512732	0.06	17.4884	17.5519	0.459475	23.9707	0.30114	4.23805	0.47996	19.4779	0.574569	3.85544	0.694674	0.899059	0.832462	4.11854	0.883806	0.543855	0.702655	3.23619	0.691494	0.643382	0.649225	1.83288	0.643114	0.252384	0.623169	1.72495	0.611684	0.245633	0.567281	0.504668	0.761018
22.36																		0.05
22.5
23.09	3.97994	21836.4	179.865	0.823693	0.852765	45.1928	0.691185	149	68.2347	37.4377	126.661	0.850076	121.447	0.81508	0.137259	0.183322	0.195851	0.0483502	26.1279	22.4904	0.588754	30.9625	0.388976	5.68709	0.644065	26.2649	0.774776	5.40993	0.974763	1.25376	1.16089	5.71838	1.22712	0.767714	0.991878	4.52728	0.967367	0.899532	0.907702	2.36379	0.829401	0.291664	0.720159	1.8086	0.641347	0.231039	0.533578	0.669198	1.0644
23.1	6.09341	40805.7	119.253	0.292246	0.302561	19.5708	0.299319	231.4	56.7078	37.9754	189.656	0.819601	189.215	0.817698	0.0838042	0.129528	0.129464	0.05	19.5844	18.1266	0.474519	28.4533	0.357453	4.58188	0.518899	21.6595	0.638923	4.25469	0.766611	1.02988	0.953589	4.52147	0.970273	0.653985	0.844941	3.60836	0.771017	0.731163	0.737803	2.18683	0.767309	0.300731	0.742546	1.84779	0.655245	0.270597	0.624936	0.544113	0.861286
23.18	4.62818	33021.5	166.992	0.505706	0.523555	36.0814	0.551834	165.6	50.1492	35.7808	131.819	0.796009	133.559	0.806516	-0.186249	-0.202196	-0.201902	0.03	17.6082	19.2594	0.504174	27.1508	0.34109	4.23293	0.47938	20.049	0.591416	3.78168	0.681383	0.912164	0.844596	3.88511	0.833714	0.563317	0.727799	3.20786	0.68544	0.686791	0.693028	2.04274	0.71675	0.29045	0.71716	1.97947	0.701941	0.321128	0.741634	0.52499	0.754587
23.34	5.17877	43664.2	130.382	0.298602	0.309141	25.1763	0.38505	121	27.7115	23.3646	76.3315	0.630839	85.1474	0.703697	0.0986271	0.228851	0.191104	0.03	17.908	18.9042	0.494875	27.5723	0.346386	4.40342	0.498689	21.1047	0.622556	4.02096	0.724497	0.934445	0.865227	4.12631	0.885474	0.515708	0.666289	3.24773	0.693959	0.677855	0.684011	1.96832	0.69064	0.291475	0.719692	1.85888	0.659178	0.274705	0.634424	0.538707	0.767089
23.39	4.32859	41851	129.191	0.308692	0.319587	29.8459	0.456467	104	24.8501	24.0263	61.1864	0.588331	74.0332	0.711857	0.07019	0.206008	0.147579	0.04	12.7459	14.2684	0.373518	20.5975	0.258763	3.12011	0.353354	15.1602	0.447205	2.75113	0.495699	0.665993	0.616661	2.9056	0.62352	0.352951	0.456009	2.07927	0.444289	0.471879	0.476165	1.46284	0.513277	0.219998	0.543206	1.50158	0.532477	0.238135	0.549965	0.391359	0.527235
23.45	4.82565	39977.2	121.826	0.304739	0.315495	25.2455	0.386108	113.3	28.3412	23.4787	72.4033	0.639041	79.892	0.705137	0.0175008	0.0973935	0.0754169	0.04	12.9151	14.9068	0.390231	22.1603	0.278395	3.39995	0.385045	16.1104	0.475233	2.80223	0.504907	0.662318	0.613258	3.16022	0.678159	0.406101	0.524678	2.32486	0.496766	0.514735	0.51941	1.63215	0.572684	0.251721	0.621534	1.55394	0.551042	0.249518	0.576254	0.416836	0.563553
23.5	2.32218	22783.5	119.126	0.522859	0.541313	51.2991	0.784574	69.9	30.68	30.101	46.5924	0.666558	53.8235	0.770008	0.0407524	0.123136	0.0890661	0.04	33.8703	30.5158	0.798843	36.4873	0.458383	6.42444	0.72757	30.8923	0.911277	5.97278	1.07618	1.4345	1.32824	6.30785	1.35362	0.976008	1.26099	5.70145	1.21826	1.18324	1.19398	3.20495	1.12455	0.397511	0.981509	2.21678	0.786092	0.303508	0.700941	0.812563	1.24746
23.53	1.54256	16624.7	123.817	0.744778	0.771065	80.2676	1.22762	57.4	34.5269	37.2109	40.3929	0.703709	46.7209	0.813952	0.204591	0.342889	0.279012	0.04	15.176	16.036	0.41979	16.336	0.205226	2.86511	0.324474	13.1319	0.387372	2.42372	0.436707	0.596921	0.552705	2.36269	0.507014	0.43338	0.559923	2.38975	0.510631	0.530985	0.535807	1.52766	0.53602	0.206482	0.509831	1.3533	0.479893	0.18925	0.437066	0.377212	0.513396
23.67	2.16082	18041.5	191.1	1.05923	1.09661	88.4389	1.3526	57.5	31.8709	26.6103	39.0435	0.679018	42.5407	0.739838	-0.114369	-0.109818	-0.112037	0.03	9.12565	10.1381	0.265394	10.1961	0.128091	2.11419	0.239432	9.29984	0.274332	1.90385	0.343036	0.441874	0.409142	1.91801	0.411591	0.260414	0.336453	1.56649	0.334719	0.31843	0.321322	0.952286	0.334135	0.139154	0.343591	0.902512	0.32004	0.152048	0.351149	0.259719	0.366988
24.18	1.78706	13830.6	501.683	3.62735	3.75537	280.731	4.29354	62.5	45.1897	34.9737	48.3513	0.773621	50.1282	0.802051	-0.059508	-0.0406427	-0.0443316	0.03	11.9926	11.9284	0.312263	8.94707	0.1124	2.56736	0.290754	10.1301	0.298823	2.39174	0.430944	0.543459	0.503203	2.44569	0.524827	0.382666	0.4944	2.0488	0.437777	0.423114	0.426957	1.20019	0.421118	0.160179	0.395505	1.02487	0.363429	0.152964	0.353266	0.300613	0.47823
25.07	0.99643	11192.3	470.556	4.20427	4.35266	472.242	7.22253	40.5	36.1855	40.6451	29.0502	0.71729	33.6017	0.829672	-0.0773863	-0.0590209	-0.0684326	0.03	10.5484	10.385	0.271858	7.73433	0.0971649	2.10822	0.238757	8.8648	0.261499	2.07434	0.373755	0.445857	0.412831	2.03991	0.43775	0.28629	0.369884	1.84151	0.393486	0.406139	0.409828	1.09242	0.383306	0.134398	0.331847	0.931757	0.33041	0.124675	0.287932	0.257371	0.397541
26.18	0.719365	6318.34	557.73	8.82716	9.1387	775.309	11.8577	26	41.15	36.143	19.5363	0.751398	21.0198	0.808455	-0.10855	-0.10344	-0.1056	0.02	9.51203	8.59852	0.225092	5.71823	0.0718371	1.7001	0.192537	6.72812	0.19847	1.54316	0.278047	0.396913	0.367512	1.72877	0.37098	0.245151	0.316733	1.59928	0.341726	0.310522	0.313342	0.975413	0.34225	0.136451	0.336916	0.746331	0.264656	0.111454	0.257399	0.205366	0.335
27.59
29.39	0.0629361	3474.01	16.0692	0.462556	0.478881	255.326	3.90499	22.3	64.191	354.328	18.7461	0.840632	21.8643	0.980462	-0.0404706	-0.02464	-0.0388658	0.02	1.21311	1.3015	0.0340708	1.55791	0.0195718	0.313705	0.0355272	1.33636	0.0394208	0.249923	0.0450312	0.0637397	0.0590183	0.324034	0.0695351	0.0369073	0.0476839	0.215063	0.0459537	0.0418001	0.0421797	0.134868	0.0473222	0.0215968	0.0533255	0.121094	0.0429412	0.0141217	0.0326135	0.0363396	0.0534444
31.27
32.43	3.24047	32318.3	264.559	0.818605	0.847497	81.6424	1.24865	115.3	35.6764	35.5813	82.2384	0.713256	92.8662	0.805431	-0.0804596	-0.0629619	-0.0706662	0.04	20.4265	16.2685	0.425877	17.326	0.217664	3.80173	0.430547	17.0625	0.50332	3.65932	0.659338	0.857653	0.794123	3.81069	0.817744	0.557745	0.7206	3.18883	0.681374	0.672064	0.678167	1.81585	0.637141	0.23893	0.589951	1.37239	0.486662	0.214047	0.494334	0.453248	0.734636
[truncated: 11 more columns]

## Sheet: Cismon 0.5 N HCl
Stratigraphic Interval (m)	[Sc] (ppm)	[Al] (ppm)	[Mn] (ppm)	Mn/Al	MnEF (Al shale normalized)	Mn/Sc	MnEF (Sc shale normalized)	[Cr] (ppm)	Cr/Al x 103	Cr/Sc	Crauthigenic (Al corrected)	fauthigenic (Al corrected)	δ53Cr (‰) - Uncorrected	δ53Cr (‰) - Detrital Cr (Al Corrected)	2se (‰)	Y (ppm)	La (ppm)	La SN	Ce (ppm)	Ce SN	Pr (ppm)	Pr SN	Nd (ppm)	Nd SN	Sm (ppm)	Sm SN	Eu (ppm)	Eu SN	Gd (ppm)	Gd SN	Tb (ppm)	Tb SN	Dy (ppm)	Dy SN	Ho (ppm)	Ho SN	Er (ppm)	Er SN	Tm (ppm)	Tm SN	Yb (ppm)	Yb SN	Lu (ppm)	Lu SN	ΣlREE	ΣmREE	ΣhREE	BSI	Ce/Ce*
11.8628	0.0529472							0.105156		1.98606						0.201163	0.174334	0.00456373	0.074148	0.000931507	0.0263276	0.0029816	0.0977904	0.00288467	0.0229295	0.00413144	0.00620463	0.00574503	0.0273412	0.0058672	0.00331193	0.00427898	0.0218232	0.00466307	0.00481788	0.00486164	0.0115972	0.00406918	0.00142746	0.0035246	0.00800349	0.00283812	0.00132973	0.00307098	0.00347667	0.00493715	0.0036729	1.3811	0.24691
13.1778	0.0581928		172.539				45.3464	0.0972463		1.67111						1.0019	0.921331	0.0241186	0.501271	0.00629737	0.167644	0.0189858	0.670381	0.0197753	0.146286	0.0263579	0.0383284	0.0354893	0.158799	0.0340771	0.0224453	0.0289991	0.122661	0.0262096	0.024921	0.0251474	0.0667999	0.0234386	0.00762588	0.0188293	0.0412927	0.0146428	0.00612403	0.0141433	0.0209599	0.0302266	0.0192403	1.50381	0.292192
15.7887	0.0401248	83.2737	287.154	3.44832	357.003	7156.54	109.453	0.220927	2.65302	5.50599	0.135738	0.614402				0.311066	0.304427	0.00796929	0.171989	0.00216067	0.0585128	0.00662659	0.213257	0.00629076	0.0576282	0.0103835	0.0175244	0.0162263	0.0737525	0.0158267	0.00801803	0.0103592	0.0412071	0.00880493	0.0086212	0.0086995	0.0231603	0.00812642	0.00287454	0.00709763	0.0152609	0.00541168	0.00230711	0.00532819	0.00696221	0.0123201	0.00693268	1.77333	0.296065
16.8104	0.0469747	36.7645	171.204	4.65678	482.114	3644.61	55.7411	0.307813	8.37254	6.55274	0.270203	0.877815				4.69384	4.36381	0.114236	3.08967	0.0388149	0.799428	0.0905354	3.35507	0.0989697	0.578847	0.104297	0.146552	0.135696	0.58165	0.124818	0.0990219	0.127935	0.503826	0.107655	0.113068	0.114095	0.280255	0.098335	0.0331986	0.0819718	0.17068	0.0605248	0.0269966	0.0623479	0.101247	0.12008	0.0834548	1.30026	0.379105
17.35	0.211638	7.93743	221.579	27.9156	2890.09	1046.97	16.0125	0.296378	37.3392	1.4004	0.288258	0.972603				5.2501	5.00546	0.131033	3.58976	0.0450974	1.09902	0.124465	4.3615	0.128658	0.960451	0.173054	0.226737	0.209941	0.931687	0.199933	0.136561	0.176435	0.764921	0.163445	0.156449	0.15787	0.401122	0.140745	0.0537335	0.132675	0.321648	0.114059	0.0455164	0.105119	0.128052	0.184562	0.130094	1.4299	0.353017
18.66	0.0504252	39.9912	368.543	9.2156	954.086	7308.71	111.78	0.682518	17.0667	13.5353	0.641607	0.940059				3.33803	3.21616	0.0841928	1.59754	0.0200696	0.464845	0.0526438	1.77805	0.0524497	0.305825	0.0551036	0.0814808	0.0754452	0.330167	0.0708512	0.0541658	0.0699817	0.31842	0.0680385	0.0691491	0.0697771	0.186672	0.065499	0.0248238	0.0612933	0.133763	0.0474336	0.0209648	0.0484176	0.0630954	0.067884	0.0584841	1.1167	0.293337
18.87	0.458532	258.037	143.75	0.55709	57.6752	313.5	4.79471	0.345512	1.339	0.753518	0.0815402	0.235998				5.46127	5.33406	0.139635	4.38386	0.0550736	1.1655	0.131993	4.59226	0.135465	0.972989	0.175313	0.236724	0.219189	0.985846	0.211555	0.13958	0.180336	0.796728	0.170241	0.15685	0.158275	0.402729	0.141308	0.0535997	0.132345	0.31474	0.11161	0.0448121	0.103492	0.135698	0.191327	0.129406	1.44341	0.405507
19.29	0.548149	286.81	85.2796	0.297339	30.7833	155.577	2.37942	0.718826	2.50628	1.31137	0.42542	0.591826	0.546083	1.00802	0.0827144	17.7102	12.8268	0.335781	11.9219	0.149773	3.09225	0.350198	13.3055	0.392493	3.0349	0.546829	0.750217	0.694646	2.95754	0.634665	0.484251	0.625647	2.67201	0.570943	0.532207	0.537041	1.2876	0.45179	0.159509	0.39385	0.82563	0.292777	0.11778	0.27201	0.359491	0.614546	0.389493	1.64101	0.436669
19.5	0.574394	329.674	78.7544	0.238885	24.7317	137.109	2.09696	0.8778	2.66263	1.52822	0.540543	0.615793	0.693996	1.20414	0.074192	14.3141	10.857	0.284215	11.3831	0.143004	2.79139	0.316126	11.5548	0.340851	2.79172	0.503012	0.663124	0.614003	2.75898	0.592055	0.416516	0.538134	2.14304	0.457915	0.420916	0.424739	0.994924	0.349096	0.116066	0.286583	0.610392	0.216451	0.0895871	0.206899	0.313731	0.541024	0.296753	1.77244	0.476408
19.87	0.68362	397.81	72.1255	0.181306	18.7705	105.505	1.61361	0.93707	2.35557	1.37075	0.53011	0.56571	0.704253	1.33979	0.0506076	25.8442	18.75	0.490838	20.8047	0.261365	4.68374	0.530435	20.6065	0.60786	4.66311	0.8402	1.11039	1.02814	4.48701	0.962877	0.719375	0.929426	3.8048	0.812992	0.750978	0.757798	1.8128	0.63607	0.212796	0.525423	1.04596	0.370908	0.14899	0.344088	0.543044	0.914727	0.526858	1.70993	0.511841
20.32	0.492422	181.058	51.5971	0.284976	29.5034	104.782	1.60255	0.780772	4.31228	1.58557	0.59555	0.762771	0.72681	0.991328	0.0811318	9.73882	7.92574	0.20748	8.54774	0.107384	2.10826	0.238761	8.54631	0.252104	2.06257	0.371634	0.503662	0.466354	1.9976	0.428669	0.310734	0.401465	1.7063	0.364594	0.311532	0.314361	0.761397	0.267157	0.0882453	0.21789	0.481766	0.170839	0.0656138	0.151533	0.232781	0.406543	0.224356	1.77865	0.481281
21.59	0.475287							0.533139		1.12172						9.19733	7.09088	0.185625	7.77563	0.0976838	1.96365	0.222384	7.9521	0.234575	1.92125	0.346172	0.463411	0.429084	1.91234	0.410373	0.286767	0.3705	1.49613	0.319686	0.289699	0.29233	0.679382	0.23838	0.0807564	0.199399	0.434013	0.153905	0.0631848	0.145923	0.214195	0.375163	0.205987	1.78572	0.478831
21.9	0.447578	265.082	81.4702	0.307339	31.8187	182.025	2.78391	0.695833	2.62497	1.55466	0.424654	0.610281	-0.0489273	-0.00100761	0.0770705	6.93382	5.23955	0.137161	5.33295	0.0669969	1.37207	0.155388	5.80219	0.171156	1.35139	0.243494	0.317496	0.293978	1.31885	0.283016	0.189438	0.244752	1.0847	0.231774	0.202889	0.204731	0.496134	0.174082	0.0630948	0.15579	0.363488	0.128896	0.0532574	0.122996	0.154568	0.259403	0.157299	1.66355	0.458023
22.36	0.0456007	146.339	92.8671	0.634601	65.6998	2036.53	31.1469	0.721594	4.93096	15.8242	0.571888	0.792535	0.627359	0.823979	0.081792	13.0795	9.69294	0.253742	11.3457	0.142534	2.31681	0.262379	10.3825	0.306269	2.30373	0.415086	0.543363	0.503114	2.23092	0.478739	0.338845	0.437784	1.84236	0.393666	0.364161	0.367468	0.899804	0.315721	0.103547	0.255671	0.517495	0.183509	0.0752339	0.17375	0.27413	0.445678	0.259224	1.67123	0.552329
22.5	0.546523	373.92	66.3145	0.17735	18.3609	121.339	1.85577	0.646219	1.72823	1.18242	0.263699	0.408065	0.281382	0.869041	0.0793442	10.0097	7.72261	0.202163	10.2508	0.12878	2.03599	0.230576	8.84993	0.26106	1.98176	0.357073	0.48003	0.444473	1.88354	0.404193	0.296386	0.382927	1.53303	0.32757	0.302437	0.305183	0.739395	0.259437	0.094295	0.232827	0.507118	0.179829	0.0779995	0.180137	0.231266	0.383247	0.231483	1.65639	0.595184
23.09	1.12501	354.936	90.5184	0.255027	26.4028	80.4603	1.23057	0.900788	2.53789	0.800696	0.537688	0.596909	0.120418	0.285399	0.0437701	57.5257	39.0633	1.0226	51.2042	0.643269	10.4184	1.17988	47.4454	1.39957	10.3354	1.86223	2.64099	2.44536	10.0618	2.15919	1.71645	2.21764	8.69905	1.85877	1.76755	1.7836	4.19364	1.47145	0.476726	1.1771	2.37079	0.840707	0.321185	0.741767	1.20068	2.10864	1.20293	1.75456	0.58413
23.1	0.688347	446.99	36.7672	0.0822552	8.51583	53.4138	0.816917	0.741573	1.65904	1.07732	0.284302	0.383377	0.0644219	0.367269	0.0536481	11.3945	7.97799	0.208848	9.80631	0.123195	2.35517	0.266723	9.74682	0.287517	2.41013	0.434258	0.604031	0.559288	2.43714	0.522992	0.370462	0.478633	1.9735	0.421688	0.364169	0.367476	0.873336	0.306434	0.103203	0.254823	0.53682	0.190362	0.0728136	0.168161	0.254363	0.483372	0.257451	1.88886	0.518092
23.18	0.788704	429.051	80.1918	0.186905	19.3502	101.675	1.55504	0.488119	1.13767	0.618888	0.0492005	0.100796				11.1416	9.80312	0.256626	11.0974	0.139414	2.32124	0.262882	9.71131	0.286469	2.21048	0.398285	0.544134	0.503828	2.21136	0.474541	0.333774	0.431232	1.85855	0.397125	0.350833	0.354019	0.899255	0.315528	0.115926	0.286237	0.650378	0.23063	0.0937672	0.216552	0.268659	0.441002	0.280593	1.60583	0.536717
23.34	0.524089	522.394	49.7707	0.0952744	9.8637	94.9662	1.45242	0.495297	0.948129	0.945062	0	0				11.0687	8.75783	0.229263	10.0499	0.126255	2.33869	0.264857	9.49738	0.280159	2.24616	0.404713	0.570577	0.528312	2.21533	0.475393	0.341026	0.440602	1.82782	0.39056	0.352298	0.355497	0.847507	0.297371	0.101407	0.250389	0.543077	0.19258	0.0766885	0.17711	0.258093	0.447916	0.254589	1.74734	0.511031
23.39	0.366184	371.147	43.7371	0.117843	12.2002	119.44	1.82674	0.497656	1.34086	1.35903	0.117973	0.237057				8.12591	6.67	0.174607	7.17991	0.0901998	1.66299	0.188334	7.05718	0.208176	1.58776	0.286082	0.373166	0.345524	1.53283	0.328934	0.23316	0.30124	1.22536	0.261829	0.243417	0.245628	0.611818	0.214673	0.0746142	0.184233	0.42229	0.149748	0.0626494	0.144687	0.190373	0.304722	0.187794	1.61158	0.497049
23.45	0.413315							0.392747		0.950237						8.22946	6.73944	0.176425	7.23978	0.090952	1.66968	0.189092	6.97257	0.20568	1.51739	0.273404	0.366006	0.338894	1.53126	0.328597	0.23367	0.3019	1.27778	0.27303	0.246558	0.248797	0.616615	0.216356	0.0762642	0.188307	0.426506	0.151243	0.0634892	0.146626	0.190399	0.303165	0.190266	1.59282	0.497662
23.5	0.542458	283.721	63.4842	0.223755	23.1653	117.031	1.78988	0.467483	1.64768	0.861788	0.177236	0.379129				22.4704	16.9532	0.4438	18.0649	0.226946	3.51832	0.398451	15.957	0.470709	3.30258	0.59506	0.853967	0.79071	3.2447	0.696287	0.560665	0.724373	3.13205	0.669241	0.65437	0.660313	1.55194	0.544541	0.190616	0.470657	0.998384	0.354037	0.136277	0.314728	0.437653	0.695134	0.468855	1.53365	0.538905
23.53	0.471203	226.849	80.8339	0.356334	36.8911	171.548	2.62367	0.377985	1.66624	0.80217	0.145919	0.386044				11.1317	9.72502	0.254582	8.46713	0.106371	1.84038	0.208423	7.47491	0.220499	1.51004	0.27208	0.372734	0.345124	1.55881	0.334509	0.270621	0.34964	1.56414	0.334217	0.326691	0.329658	0.841811	0.295372	0.106062	0.26188	0.631803	0.224044	0.0902504	0.208431	0.227835	0.327114	0.263877	1.33051	0.459481
23.67	0.0420523	73.9729	124.132	1.67807	173.73	2951.85	45.1459	0.1499	2.02641	3.5646	0.0742252	0.495167				0.0701455	0.0908554	0.00237841	0.0271616	0.000341226	0.00614435	0.000695849	0.0255845	0.000754704	0.00903743	0.00162837	0.00398213	0.00368716	0.019537	0.00419249	0.000779154	0.00100666	0.00405497	0.000866446	0.00100996	0.00101913	0.00220916	0.000775143	0.000309641	0.000764547	0.00143318	0.00050822	0.000239877	0.000553988	0.00127632	0.00227622	0.000724205	2.27562	0.221989
24.18	0.0425227	30.303	221.924	7.3235	758.198	5218.96	79.8194	0.636108	20.9916	14.9593	0.605108	0.951266				0.108095	0.11447	0.00299659	0.0338868	0.000425714	0.0156801	0.00177578	0.051856	0.00152967	0.0190148	0.00342609	0.00717153	0.0066403	0.0319468	0.00685555	0.00211738	0.00273563	0.0106604	0.00227786	0.0021374	0.00215681	0.00566221	0.00198674	0.000862775	0.00213031	0.004757	0.00168688	0.000673683	0.00155585	0.00210068	0.00438709	0.00190332	2.19135	0.178408
25.07	0.0392504	49.2085	193.632	3.93493	407.381	4933.24	75.4496	0.179313	3.64395	4.56845	0.128973	0.719261				0.794273	0.70106	0.0183524	0.259053	0.00325444	0.102798	0.0116419	0.375056	0.0110636	0.0812576	0.014641	0.0224302	0.0207687	0.0903563	0.0193898	0.0135252	0.0174745	0.0832969	0.0177985	0.0183999	0.018567	0.047683	0.0167309	0.00584258	0.0144261	0.0344104	0.0122023	0.00521601	0.0120462	0.013686	0.0180145	0.0147945	1.26504	0.217004
26.18	0.0377543	159.167	219.596	1.37966	142.835	5816.46	88.9576	0.348238	2.18788	9.2238	0.18541	0.532424				0.866616	0.746968	0.0195541	0.295526	0.00371264	0.113	0.0127973	0.418887	0.0123566	0.0857465	0.0154498	0.0219546	0.0203283	0.0895244	0.0192112	0.0160559	0.0207441	0.0905309	0.0193442	0.0208142	0.0210032	0.055214	0.0193733	0.0075425	0.0186234	0.040779	0.0144607	0.00646425	0.014929	0.0149027	0.0190155	0.0176779	1.16729	0.22952
27.59	0.275655	278.124	278.805	1.00245	103.783	1011.43	15.4689	1.13131	4.06764	4.10408	0.846788	0.748503	0.0676666	0.132044	0.0747883	5.96531	4.08532	0.106946	1.15229	0.014476	0.656023	0.0742948	2.28749	0.0674775	0.554842	0.0999715	0.143947	0.133284	0.553127	0.118697	0.0984764	0.12723	0.612288	0.130831	0.137566	0.138816	0.37671	0.132179	0.0514495	0.127036	0.318132	0.112813	0.0446943	0.10322	0.082906	0.122003	0.122813	1.18611	0.159744
29.39	0.784506	430.596	109.054	0.253264	26.2203	139.01	2.12604	0.842759	1.95719	1.07425	0.402259	0.477312	0.231419	0.620409	0.0936777	14.0099	8.94102	0.234058	6.76878	0.0850349	2.59548	0.293938	9.90951	0.292316	2.66295	0.479811	0.663318	0.614184	2.69512	0.578351	0.4056	0.524031	2.01765	0.431121	0.388764	0.392294	0.898846	0.315385	0.100605	0.248407	0.517911	0.183656	0.0701194	0.161939	0.273438	0.5255	0.260336	1.969	0.322104
31.27	0.0421213	168.935	136.848	0.810062	83.8653	3248.89	49.689	0.284408	1.68354	6.75212	0.111588	0.392352				0.320553	0.245492	0.00642648	0.0654763	0.000822566	0.0325944	0.00369133	0.121749	0.00359141	0.0284412	0.00512455	0.00947969	0.00877749	0.0401912	0.00862473	0.00489402	0.00632302	0.0266556	0.00569565	0.00639157	0.00644962	0.0166634	0.0058468	0.00210951	0.00520867	0.0123291	0.00437203	0.00205089	0.00473647	0.00456974	0.00690909	0.00532272	1.39684	0.162598
32.43	0.0355386							0.246676		6.94108						0.787605	0.468635	0.0122679	0.243716	0.00306176	0.0904398	0.0102423	0.35303	0.0104139	0.0813579	0.0146591	0.0206802	0.0191483	0.0866951	0.0186041	0.0138155	0.0178495	0.0760755	0.0162554	0.0155144	0.0156553	0.0381336	0.0133802	0.00399017	0.00985227	0.0198355	0.00703387	0.00292161	0.00674737	0.0109747	0.0173033	0.0105338	1.60897	0.272033
[truncated: 5 more columns]

## Sheet: DSDP Site 463 Bulk
Stratigraphic Interval (m)	[Sc] (ppm)	[Al] (ppm)	[Mn] (ppm)	Mn/Al x 102	MnEF (Al shale normalized)	Mn/Sc	MnEF (Sc shale normalized)	[Cr] (ppm)	Cr/Al x 103	Cr/Sc	Crauthigenic (Al corrected)	fauthigenic (Al corrected)	Crauthigenic (Sc corrected)	fauthigenic (Sc corrected)	δ53Cr (‰) - Uncorrected	δ53Cr (‰) - Detrital Cr (Al Corrected)	δ53Cr (‰) - Detrital Cr (Sc Corrected)	2se (‰)	Y (ppm)	La (ppm)	La SN	Ce (ppm)	Ce SN	Pr (ppm)	Pr SN	Nd (ppm)	Nd SN	Sm (ppm)	Sm SN	Eu (ppm)	Eu SN	Gd (ppm)	Gd SN	Tb (ppm)	Tb SN	Dy (ppm)	Dy SN	Ho (ppm)	Ho SN	Er (ppm)	Er SN	Tm (ppm)	Tm SN	Yb (ppm)	Yb SN	Lu (ppm)	Lu SN	ΣlREE	ΣmREE
547.08
549.29
557.01	0.164062	3923.53	211.394	5.38785	5.57801	1288.5	19.7064	0.8	2.03898	4.87619	0	0	0	0					8.4189	7.80758	0.204387	3.87572	0.04869	1.64368	0.186147	5.96363	0.175918	1.35776	0.244642	0.302328	0.279933	1.54887	0.332376	0.216991	0.280351	1.16145	0.248172	0.249097	0.251359	0.713164	0.250233	0.0917756	0.226606	0.57141	0.202628	0.0972915	0.224692	0.188817	0.277095
557.28
559.04	0.544325	4448.03	259.771	5.84013	6.04625	477.235	7.29888	4.5	10.1168	8.26712	0	0	0.731597	0.162577					7.93171	8.85176	0.231722	4.4935	0.0564511	1.66761	0.188857	6.19505	0.182745	1.28302	0.231175	0.349364	0.323485	1.44632	0.310369	0.185314	0.239424	1.21826	0.260311	0.259893	0.262254	0.783272	0.274832	0.100428	0.247969	0.614272	0.217827	0.0872423	0.201483	0.201108	0.272953
559.41	1.09577	7691.61	285.436	3.71101	3.84199	260.489	3.98395	8	10.4009	7.3008	0.133583	0.0166979	0.413894	0.0517367					10.9817	11.6496	0.304963	6.33122	0.0795379	2.31684	0.262383	8.94711	0.263926	2.0806	0.374883	0.55595	0.514768	2.28736	0.490849	0.28635	0.369961	1.75034	0.374003	0.366464	0.369793	1.00902	0.354041	0.138507	0.341992	0.785943	0.278703	0.0958965	0.22147	0.277091	0.424893
559.69	0.349333	6295.1	242.393	3.8505	3.9864	693.873	10.6122	4	6.35415	11.4504	0	0	1.58154	0.395384					7.56558	8.83863	0.231378	4.58914	0.0576525	1.74837	0.198003	6.34018	0.187026	1.51706	0.273344	0.333131	0.308454	1.83693	0.394192	0.237093	0.306322	1.23429	0.263738	0.259101	0.261454	0.659724	0.231482	0.103143	0.254674	0.57404	0.20356	0.0854579	0.197362	0.205469	0.30921
567.57	0.73345	9027.05	312.261	3.45917	3.58126	425.743	6.51137	9.6	10.6347	13.0888	0.36779	0.0383114	4.52227	0.47107					8.62705	9.66537	0.25302	6.05368	0.0760512	1.90998	0.216306	7.54036	0.222429	1.68589	0.303763	0.431179	0.39924	1.61902	0.34743	0.215857	0.278885	1.30655	0.279178	0.288944	0.291568	0.828707	0.290774	0.115172	0.284374	0.64128	0.227404	0.0921862	0.212901	0.230585	0.321699
576.55	0.904061	5345.03	365.605	6.8401	7.08151	404.403	6.18499	7.9	14.7801	8.73835	2.43349	0.308037	1.64111	0.207736					9.8386	10.4942	0.274717	5.02509	0.0631293	2.31384	0.262043	8.157	0.24062	2.04581	0.368614	0.525133	0.486234	2.39335	0.513594	0.270683	0.34972	1.65388	0.353393	0.328952	0.33194	0.925441	0.324716	0.112335	0.277371	0.704317	0.249758	0.106979	0.247065	0.259127	0.414311
587.025	0.479305	4012.68	407.825	10.1634	10.5221	850.868	13.0133	1.9	4.735	3.96407	0	0	0	0					8.52095	8.80763	0.230566	4.20072	0.0527729	1.78807	0.202499	6.40714	0.189001	1.41684	0.255286	0.3666	0.339444	1.46876	0.315185	0.219503	0.283596	1.35534	0.289602	0.27797	0.280495	0.751145	0.26356	0.0954828	0.23576	0.612824	0.217313	0.0933237	0.215528	0.207356	0.296623
595.05	0.372789	4842.83	553.994	11.4395	11.8432	1486.08	22.7282	3.9	8.05314	10.4617	0	0	1.31915	0.338244					6.17356	6.81733	0.178464	3.97391	0.0499235	1.16691	0.132153	4.73754	0.13975	0.935068	0.168481	0.204236	0.189107	1.08439	0.232701	0.143282	0.185119	0.917842	0.19612	0.213182	0.215118	0.583278	0.204659	0.0803849	0.198481	0.481958	0.170907	0.0754719	0.1743	0.150123	0.194306
607.105	1.58556	8301.8	1289.52	15.533	16.0812	813.288	12.4385	5.3	6.38416	3.34267	0	0	0	0					15.8033	17.5459	0.459317	14.1256	0.177457	3.78511	0.428665	15.5901	0.459885	3.3938	0.611495	0.921778	0.853498	3.87394	0.831318	0.494766	0.639232	2.89386	0.618346	0.582369	0.587658	1.62858	0.571432	0.221483	0.546871	1.26656	0.449134	0.196958	0.454869	0.449289	0.710778
607.58	11.413	40863.2	687.234	1.68179	1.74115	60.2152	0.920938	74.4	18.2071	6.5189	32.6081	0.43828	0	0	0.016771	0.193344	0.016771	0.0698584	13.5319	10.9845	0.287552	14.3894	0.180772	2.49682	0.282766	11.7952	0.34794	2.72405	0.49082	0.803803	0.744262	2.89616	0.621494	0.426266	0.550732	2.72134	0.581482	0.575399	0.580624	1.68361	0.590741	0.250037	0.617376	1.50825	0.534842	0.231126	0.533779	0.306086	0.597758
614.755	4.25742	22797.1	180.697	0.792629	0.820604	42.4428	0.649125	31.4	13.7737	7.37535	8.08474	0.257476	1.92553	0.0613228	-0.055962	0.131598	-0.055962	0.0806465	5.77179	7.12476	0.186512	12.5633	0.15783	1.84381	0.208812	9.08674	0.268046	1.47989	0.266647	0.416563	0.385707	1.78992	0.384103	0.205413	0.265392	1.08835	0.232554	0.214131	0.216076	0.680924	0.238921	0.102899	0.254073	0.61314	0.217425	0.107843	0.24906	0.221123	0.30688
616.23	3.96934	20171.8	148.733	0.737332	0.763355	37.4704	0.573076	47.7	23.6469	12.0171	27.0698	0.567501	20.2199	0.423898	0.0981509	0.265168	0.39599	0.0750985	16.7571	15.4828	0.40531	22.7551	0.285868	3.79954	0.430298	18.0576	0.532673	3.34348	0.602429	0.862376	0.798496	3.78025	0.811212	0.466221	0.602352	2.67625	0.571849	0.556718	0.561774	1.46361	0.513548	0.189393	0.467638	1.15196	0.408497	0.18472	0.426605	0.456094	0.677268
616.88	13.8385	45994.5	409.428	0.890167	0.921585	29.5862	0.452495	229.1	49.8103	16.5553	182.06	0.794675	133.295	0.581821	-0.169948	-0.182595	-0.205129	0.0657495	9.52383	8.55759	0.224021	12.7576	0.160271	2.01728	0.228457	9.76722	0.288118	1.78556	0.321723	0.545586	0.505172	2.0533	0.440621	0.280433	0.362316	1.58782	0.339278	0.351789	0.354984	1.00286	0.35188	0.155055	0.382853	0.970798	0.344255	0.141651	0.32714	0.246866	0.393822
617.885	2.3873	12439.4	258.337	2.07677	2.15007	108.213	1.65502	18.1	14.5506	7.58177	5.37793	0.297123	1.57251	0.086879	-0.03472	0.169384	0.872105	0.0614591	6.38251	6.78898	0.177722	12.0756	0.151703	1.55926	0.176586	8.31188	0.245188	1.5538	0.279963	0.377194	0.349253	1.66516	0.357331	0.177452	0.229266	1.16062	0.247996	0.240618	0.242804	0.686532	0.240889	0.0991468	0.244807	0.633781	0.224745	0.0927342	0.214167	0.199832	0.292762
618.81	3.36796	17307.2	657.634	3.79978	3.93389	195.262	2.98636	26.6	15.3694	7.89797	8.8995	0.334568	3.28338	0.123435	-0.140547	-0.179424	-0.279356	0.065918	11.4544	11.8584	0.310428	19.1271	0.24029	2.92515	0.331274	14.0341	0.413984	2.48551	0.44784	0.699903	0.648058	2.88247	0.618556	0.348297	0.449996	1.96817	0.420548	0.415424	0.419197	1.22542	0.429973	0.166139	0.41022	1.02364	0.362992	0.15895	0.36709	0.351895	0.517
622.59	10.5127	44498.9	146.856	0.330022	0.34167	13.9694	0.213649	310.4	69.7545	29.5261	264.89	0.853382	237.619	0.765527	-0.0739645	-0.0658834	-0.0595579	0.0480081	13.8743	11.507	0.30123	25.1033	0.315368	3.30367	0.374142	17.7081	0.522363	3.35578	0.604646	0.981827	0.909099	3.47119	0.74489	0.488125	0.630653	2.87483	0.61428	0.592676	0.598059	1.58077	0.554655	0.183343	0.452698	1.10452	0.391674	0.15326	0.353948	0.399245	0.700714
622.71	12.8506	36922.4	2939.6	7.96157	8.24256	228.752	3.49856	395.8	107.198	30.8001	358.038	0.904594	306.834	0.775226	-0.088946	-0.0855653	-0.0796521	0.0820694	12.2695	9.58263	0.250854	17.1789	0.215815	2.17228	0.246012	12.1295	0.357802	2.18731	0.39411	0.690172	0.639048	2.28698	0.490769	0.377237	0.487386	2.23802	0.478209	0.483211	0.4876	1.39365	0.488999	0.164178	0.405378	1.22868	0.435704	0.19362	0.447159	0.284889	0.497905
622.84	17.226	46545	908.58	1.95205	2.02094	52.7446	0.806682	254.1	54.5924	14.7509	206.497	0.812661	134.843	0.530669	-0.142542	-0.147508	-0.161594	0.0563075	14.961	10.2193	0.267521	19.2283	0.241562	2.44406	0.276791	13.6691	0.403219	2.64218	0.476069	0.812838	0.752628	2.81093	0.603204	0.461937	0.596818	2.85692	0.610452	0.583386	0.588684	1.62159	0.568979	0.224299	0.553824	1.4108	0.500284	0.216548	0.500111	0.315844	0.607834
623.19	8.95431	31295	76.9974	0.246038	0.254721	8.59892	0.131513	133.2	42.5628	14.8755	101.194	0.759713	71.2086	0.534599	-0.0887825	-0.0785925	-0.0607351	0.0847431	8.3363	5.3372	0.139717	10.27	0.12902	1.48252	0.167896	8.12672	0.239726	1.873	0.337477	0.573716	0.531218	1.94766	0.417953	0.275872	0.356424	1.73627	0.370999	0.354514	0.357734	0.964281	0.338344	0.125482	0.309832	0.695163	0.246512	0.114918	0.2654	0.182446	0.402814
623.45
623.62	2.21731	12726.9	69.8792	0.549068	0.568447	31.5153	0.481998	13.4	10.5289	6.04335	0.383896	0.028649	0	0	-0.0466259	-0.0466259	-0.0466259	0.053888	5.51762	5.76974	0.15104	10.9369	0.137399	1.59762	0.180931	8.06424	0.237883	1.80739	0.325655	0.598171	0.553862	2.24284	0.481296	0.184061	0.237805	1.07497	0.229695	0.223007	0.225033	0.660533	0.231766	0.0869022	0.214573	0.575056	0.203921	0.0951906	0.21984	0.189952	0.365663
623.77	3.62605	16631.7	192.535	1.15764	1.19849	53.0975	0.81208	16.1	9.68032	4.44009	0	0	0	0	-0.0369123	-0.0369123	-0.0369123	0.0644954	7.83162	10.2216	0.26758	19.6389	0.24672	2.53551	0.287148	13.3924	0.395056	2.3777	0.428414	0.623086	0.576932	2.92352	0.627366	0.296068	0.382517	1.57433	0.336395	0.303101	0.305854	1.02461	0.359514	0.141865	0.350285	0.879087	0.311733	0.114481	0.264391	0.316595	0.470324
623.985	4.49803	32043.1	86.6046	0.270276	0.279815	19.2539	0.294471	54.8	17.102	12.1831	22.0287	0.401983	23.6598	0.431748	0.114042	0.463706	0.423397	0.0733545	8.06279	15.268	0.399686	32.2409	0.405037	3.62236	0.410233	20.3407	0.60002	2.71915	0.489936	0.698323	0.646596	3.1243	0.670451	0.299105	0.38644	1.63618	0.349611	0.345834	0.348975	0.962806	0.337827	0.141895	0.350357	0.961268	0.340875	0.144506	0.333731	0.46998	0.508607
624.565	2.27954	17420.1	1023.77	5.87699	6.08441	449.115	6.86881	19.1	10.9644	8.37888	1.28402	0.0672264	3.31857	0.173747	-0.190691	-0.190691	-0.522105	0.0385174	11.6347	13.0904	0.34268	20.2743	0.254703	2.98889	0.338492	14.5217	0.428368	2.50305	0.450999	0.743957	0.688849	3.08987	0.663063	0.380044	0.491013	1.93352	0.413146	0.417508	0.421299	1.09845	0.385421	0.141768	0.350044	0.970346	0.344094	0.153391	0.354251	0.369847	0.541414
624.905	2.29102	14028.1	278.854	1.98783	2.05799	121.716	1.86154	17.8	12.6888	7.76948	3.45312	0.193995	1.93912	0.108939	-0.12685	-0.151154	-0.174698	0.0623868	6.40641	8.2302	0.21545	12.8729	0.16172	1.8709	0.21188	9.3933	0.277088	1.54484	0.27835	0.421446	0.390228	1.98119	0.425148	0.196605	0.254012	1.15049	0.245831	0.224911	0.226954	0.712651	0.250053	0.0981473	0.242339	0.621961	0.220553	0.0880271	0.203296	0.234806	0.318714
625.085	6.92553	33858.8	926.948	2.73769	2.83431	133.845	2.04704	29.9	8.8308	4.31736	0	0	0	0					30.0344	30.2764	0.792576	53.0696	0.666703	8.40335	0.951682	41.0279	1.21026	7.75353	1.39703	1.90922	1.7678	8.47778	1.81927	0.950206	1.22766	5.21922	1.11522	1.03729	1.04671	2.76305	0.969491	0.356034	0.879097	2.04169	0.724003	0.343396	0.793061	0.98484	1.46539
625.32	7.54231	34497.5	754.186	2.18621	2.26337	99.9941	1.52932	35	10.1457	4.64049	0	0	0	0	-0.157135	-0.157135	-0.157135	0.0670623	8.49152	10.3121	0.269951	17.7517	0.223011	2.43698	0.275989	11.9602	0.352809	2.08766	0.376155	0.504196	0.466848	2.27108	0.487357	0.213833	0.27627	1.47504	0.315179	0.332607	0.335628	1.0002	0.350947	0.150866	0.372509	1.05238	0.373183	0.159861	0.369194	0.299583	0.384362
625.49	2.7724	15352.9	1208.66	7.87252	8.15037	435.963	6.66767	12.2	7.94637	4.40053	0	0	0	0					13.988	15.6495	0.409672	21.6887	0.272471	3.76015	0.425838	16.9214	0.499155	3.121	0.562343	0.810167	0.750154	3.40728	0.731177	0.381877	0.493381	2.25294	0.481397	0.467287	0.471531	1.27611	0.44776	0.173228	0.427724	1.11827	0.396551	0.151945	0.350912	0.444888	0.60369
625.7	2.13746	9229.83	1969.33	21.3366	22.0897	921.341	14.0911	9.8	10.6177	4.58487	0.360399	0.0367754	0	0	-0.145108	-0.776546	-0.145108	0.0648901	15.9024	16.3226	0.427292	12.7187	0.159783	2.92411	0.331157	12.215	0.360324	2.42653	0.437213	0.646622	0.598724	2.58225	0.554132	0.33401	0.431538	2.04915	0.437853	0.474005	0.47831	1.39735	0.4903	0.187773	0.463636	1.19461	0.42362	0.191763	0.44287	0.372924	0.491892
626.49	3.50413	12728.9	1494.32	11.7396	12.154	426.446	6.52211	15.5	12.177	4.42335	2.48183	0.160118	0	0	-0.238561	-0.855214	-0.238561	0.0764708	19.721	18.8247	0.492794	20.5606	0.258299	4.57432	0.518043	20.0116	0.590311	4.0737	0.734	0.995088	0.921378	4.34322	0.932022	0.565644	0.730806	3.00394	0.641868	0.581349	0.586628	1.73876	0.610092	0.220979	0.545626	1.47449	0.522868	0.208178	0.48078	0.533716	0.792015
627.175	1.315	5808.52	1073.19	18.4761	19.1282	816.116	12.4818	6.8	11.7069	5.17112	0.859464	0.126392	0	0	-0.0653362	0.319407	-0.0653362	0.0627816	13.3905	13.756	0.360104	9.68926	0.121724	2.67216	0.302623	10.2653	0.302813	2.15709	0.388665	0.488657	0.45246	2.39101	0.513092	0.318141	0.411035	1.89692	0.405324	0.391455	0.39501	1.13327	0.397639	0.161031	0.397607	0.936449	0.332074	0.143435	0.331259	0.321846	0.434115
627.575	2.45157	11342.4	750.111	6.61333	6.84674	305.972	4.67957	10.2	8.99279	4.1606	0	0	0	0	-0.0474999	-0.0474999	-0.0474999	0.0849405	16.9579	16.3632	0.428356	11.0059	0.138266	3.48278	0.394426	13.6687	0.403208	2.94016	0.529759	0.731632	0.677437	3.17122	0.680519	0.43641	0.563837	2.44702	0.522868	0.526503	0.531284	1.33336	0.467844	0.181042	0.447016	0.98763	0.350223	0.162065	0.374285	0.408663	0.594884
628.335	1.06282	4829.68	902.856	18.6939	19.3537	849.49	12.9922	14.8	30.6438	13.9252	9.86055	0.666253	7.442	0.502838	-0.0517695	-0.0170899	0.0166795	0.0757817	14.5786	13.8589	0.362799	6.81353	0.0855971	2.61746	0.296428	9.20385	0.2715	2.07243	0.373411	0.523204	0.484448	2.16413	0.464405	0.285501	0.368864	2.00382	0.428168	0.448048	0.452117	1.1541	0.404949	0.175721	0.433879	0.999985	0.354605	0.146981	0.339448	0.310242	0.423859
628.585	2.52634	16629.1	458.634	2.75802	2.85536	181.541	2.77652	11.9	7.15612	4.71038	0	0	0	0	-0.165285	-0.165285	-0.165285	0.0747792	11.2856	11.7759	0.308269	13.7254	0.17243	2.68034	0.303549	12.039	0.355133	2.2408	0.403748	0.535337	0.495683	2.26351	0.485733	0.312801	0.404136	1.73519	0.370767	0.372558	0.375941	1.01327	0.355534	0.142864	0.35275	0.954891	0.338614	0.151082	0.34892	0.322317	0.432013
635.4	2.40074	17448.3	488.63	2.80044	2.89928	203.533	3.11286	11.2	6.41895	4.66523	0	0	0	0					13.1967	14.4215	0.377526	17.2802	0.217088	3.22689	0.365446	14.7723	0.43576	2.67856	0.482624	0.7102	0.657592	2.78712	0.598095	0.356013	0.459965	1.95901	0.418592	0.452583	0.456693	1.28975	0.452544	0.166479	0.41106	1.07008	0.379462	0.172857	0.399207	0.39291	0.523374
643.535	1.84945	9609.22	621.385	6.46655	6.69479	335.983	5.13857	7.3	7.59687	3.94711	0	0	0	0					15.7033	15.3127	0.400855	13.8698	0.174244	3.29092	0.372698	14.0912	0.41567	2.684	0.483604	0.720266	0.666913	3.07881	0.660689	0.378101	0.488503	2.17722	0.465218	0.497324	0.50184	1.32774	0.465872	0.160959	0.39743	1.02369	0.36301	0.161765	0.37359	0.396408	0.552985
[truncated: 11 more columns]

## Sheet: DSDP Site 463 0.5 N HCl
Stratigraphic Interval (m)	[Sc] (ppm)	[Al] (ppm)	[Mn] (ppm)	Mn/Al	MnEF (Al shale normalized)	Mn/Sc	MnEF (Sc shale normalized)	[Cr] (ppm)	Cr/Al x 103	Cr/Sc	Crauthigenic (Al corrected)	fauthigenic (Al corrected)	δ53Cr (‰) - Uncorrected	δ53Cr (‰) - Detrital Cr Corrected	2se (‰)	Y (ppm)	La (ppm)	La SN	Ce (ppm)	Ce SN	Pr (ppm)	Pr SN	Nd (ppm)	Nd SN	Sm (ppm)	Sm SN	Eu (ppm)	Eu SN	Gd (ppm)	Gd SN	Tb (ppm)	Tb SN	Dy (ppm)	Dy SN	Ho (ppm)	Ho SN	Er (ppm)	Er SN	Tm (ppm)	Tm SN	Yb (ppm)	Yb SN	Lu (ppm)	Lu SN	ΣlREE	ΣmREE	ΣhREE	BSI	Ce/Ce*
547.08	0.0728052	60.1443	93.1621	1.54898	160.365	1279.61	19.5705	0.0362476		0.497871	0	0
549.29	0.0778827		98.2521			1261.54	19.2941	0.03881		0.498313
557.01	0.0677605		95.0703			1403.04	21.4582	0.0197568		0.291568
557.28	0.0712039		99.3053			1394.66	21.3301	0.0476357		0.669004
559.04	0.0706263	39.9609	110.415	2.76309	286.061	1563.38	23.9104	0.0312942	0.783121	0.443096	0	0
559.41	0.0729517		119.763			1641.68	25.108	0.0409872		0.561841
559.69	0.0752314	22.7338	134.621	5.92163	613.063	1789.43	27.3678	0.03696	1.62577	0.491285	0.0137033	0.37076
567.57	0.0641614	100.232	122.606	1.22323	126.64	1910.9	29.2255	0.046816	0.467078	0.72966	0	0
576.55	0.0732421	26.2365	150.998	5.75527	595.839	2061.63	31.5308	0.0526506	2.00677	0.718857	0.0258106	0.490225
587.025	0.058162	729.265	143.827	0.197222	20.4182	2472.87	37.8203	0.0573367	0.0786225	0.985809	0	0
595.05	0.0571493	73.15	260.151	3.5564	368.192	4552.13	69.6208	0.0390997	0.534514	0.684169	0	0
607.105	0.0723665		623.88			8621.11	131.852	0.0278523		0.384878
607.58	6.36635	330.713	470.007	1.42119	147.135	73.8269	1.12912	0.689589	2.08516	0.108318	0.351269	0.509389	-0.0464713	0.0281603	0.0368348	16.232	10.4349	0.273164	13.1582	0.165304	2.5917	0.29351	11.487	0.338848	2.57605	0.464154	0.738836	0.684107	2.73202	0.586271	0.459831	0.594097	2.88954	0.617423	0.579944	0.585211	1.61776	0.567634	0.221872	0.547832	1.40341	0.497663	0.203432	0.46982	0.301841	0.58921	0.533632	1.41048	0.583419
614.755	0.986763	910.1	149.313	0.164062	16.9853	151.316	2.31424	0.390732	0.429329	0.395974	0	0				4.56562	4.67767	0.122452	7.7242	0.0970377	1.28913	0.145994	6.14539	0.18128	1.20251	0.216668	0.301439	0.27911	1.14982	0.246742	0.145189	0.187582	0.84451	0.180451	0.149355	0.150711	0.399684	0.14024	0.0505004	0.124692	0.298294	0.105778	0.0422974	0.0976844	0.149909	0.222111	0.123821	1.62285	0.722959
616.23	0.902595	1191.11	104.064	0.0873674	9.0451	115.294	1.76333	0.877832	0.736987	0.972565	0	0	0.253074	0.253074	0.0814813	16.2017	13.9559	0.365338	19.5816	0.246001	3.61499	0.409399	15.5959	0.460057	3.15263	0.568042	0.749991	0.694436	3.15661	0.677385	0.46114	0.595788	2.63336	0.562684	0.508227	0.512842	1.36377	0.478516	0.166709	0.411628	0.910774	0.322969	0.126051	0.29111	0.411598	0.619667	0.403413	1.52063	0.635056
616.88	1.79909	594.515	83.7751	0.140913	14.5887	46.5652	0.712173	1.5234	2.56242	0.846759	0.91521	0.600769	-0.10957	-0.0999845	0.0603449	5.60978	4.40983	0.115441	6.06372	0.0761774	1.09821	0.124373	5.07796	0.149792	1.03249	0.186035	0.276489	0.256008	1.01149	0.217058	0.169503	0.218996	0.963312	0.205836	0.193264	0.195019	0.516114	0.181093	0.0659875	0.162932	0.366679	0.130028	0.0491942	0.113613	0.129868	0.216787	0.156537	1.51384	0.635307
617.885	0.602141	882.695	262.674	0.297582	30.8085	436.234	6.67181	0.343837	0.389531	0.571024	0	0				6.22426	5.49934	0.143962	9.49329	0.119262	1.41613	0.160377	7.25017	0.213869	1.33032	0.239696	0.336086	0.311191	1.29888	0.27873	0.185948	0.240243	1.10404	0.235905	0.215634	0.217592	0.584587	0.205118	0.0753735	0.186107	0.464101	0.164575	0.0666053	0.153823	0.172736	0.261153	0.185443	1.45823	0.783748
618.81	0.953483	814.428	675.57	0.829502	85.8779	708.529	10.8363	0.708416	0.869832	0.742977	0	0				11.9911	10.1378	0.265387	16.46	0.206783	2.75128	0.311583	12.4166	0.366271	2.40224	0.432837	0.608007	0.56297	2.4669	0.529377	0.346039	0.447078	2.01948	0.431512	0.393398	0.396971	1.05256	0.369321	0.139563	0.344599	0.826336	0.293027	0.119241	0.275384	0.314414	0.480755	0.33586	1.47862	0.716791
622.59	0.84631	481.114	112.682	0.234209	24.2476	133.144	2.03633	0.815801	1.69565	0.963951	0.323621	0.396691	-0.167631	-0.233942	0.0798305	7.56499	5.25026	0.137441	11.5402	0.144978	1.61385	0.182769	8.55546	0.252374	1.7786	0.320469	0.498292	0.461382	1.74683	0.374856	0.272833	0.352497	1.55864	0.333043	0.293708	0.296376	0.767278	0.26922	0.0913617	0.225584	0.492642	0.174696	0.0662092	0.152908	0.190861	0.368449	0.223757	1.7773	0.905517
622.71	4.18535	513.698	3201.09	6.23147	645.14	764.833	11.6974	5.02286	9.77784	1.2001	4.49734	0.895376	0.0885387	0.113366	0.0667144	12.2303	8.12267	0.212635	14.6033	0.183458	1.99912	0.226401	10.3385	0.304972	2.06106	0.371363	0.57954	0.536612	2.00674	0.430631	0.346048	0.447091	2.14012	0.457292	0.433608	0.437546	1.18911	0.417233	0.165504	0.408652	0.973374	0.345168	0.153473	0.35444	0.248003	0.448598	0.392608	1.40053	0.835731
622.84	8.373	467.53	850.383	1.81888	188.308	101.562	1.55331	0.86636	1.85306	0.103471	0.388076	0.447939	-0.110886	-0.0947328	0.129443	15.7594	9.11788	0.238688	16.8563	0.211763	2.33143	0.264036	12.2551	0.361507	2.40931	0.43411	0.766532	0.709752	2.3627	0.507018	0.469607	0.606728	2.69846	0.576595	0.562587	0.567696	1.44474	0.506928	0.199238	0.491946	1.14757	0.406938	0.165222	0.381574	0.288077	0.56684	0.471016	1.49347	0.842461
623.19	0.581797	534.691	50.3129	0.0940972	9.74183	86.4784	1.32261	0.442094	0.826822	0.759877	0	0				5.33274	2.75614	0.0721504	5.16349	0.064868	0.805972	0.0912765	4.14231	0.122192	0.980681	0.176699	0.307074	0.284328	1.01032	0.216807	0.185601	0.239794	1.03787	0.221767	0.209274	0.211175	0.523115	0.183549	0.0670018	0.165437	0.35389	0.125493	0.0446112	0.103028	0.0952063	0.227879	0.157736	1.80182	0.793847
623.45	4.19912	474.493	1064.54	2.24353	232.271	253.515	3.87728	1.20612	2.54191	0.287232	0.720714	0.597547	-0.152886	-0.152886	0.0638239	12.2184	7.751	0.202906	13.8428	0.173904	2.1655	0.245244	10.7699	0.317695	2.18851	0.394325	0.616738	0.571054	2.18292	0.468439	0.376314	0.486193	2.19156	0.468281	0.423839	0.427688	1.16348	0.408239	0.159543	0.393933	0.910867	0.323002	0.129601	0.299308	0.255282	0.477658	0.370434	1.52676	0.776098
623.62	0.645577	626.781	55.2108	0.0880862	9.11951	85.5215	1.30798	0.210868	0.33643	0.326634	0	0				4.73101	3.72572	0.097532	6.98343	0.0877315	1.20359	0.136307	5.82461	0.171817	1.21834	0.219521	0.316353	0.29292	1.24535	0.267243	0.17112	0.221086	0.947885	0.20254	0.173655	0.175232	0.45826	0.160793	0.0557272	0.137598	0.317291	0.112514	0.0448961	0.103686	0.135219	0.240662	0.137965	1.7619	0.750358
623.77	2.31275	846.032	181.326	0.214325	22.1889	78.4028	1.1991	0.30924	0.365519	0.133711	0	0				6.4832	4.74857	0.124308	9.19116	0.115467	1.51766	0.171876	7.57042	0.223316	1.57681	0.284111	0.410817	0.380386	1.5354	0.329485	0.232083	0.299849	1.31232	0.280411	0.254916	0.257231	0.646543	0.226857	0.0828608	0.204595	0.50069	0.17755	0.0721422	0.16661	0.173167	0.314848	0.206568	1.65825	0.779696
623.985	0.230889	710.638	4.70208	0.0066167	0.685023	20.3651	0.311466	0.20139	0.283394	0.872238	0	0				2.61672	2.03533	0.053281	4.56337	0.0573287	0.677597	0.0767381	3.43034	0.10119	0.712168	0.128318	0.197301	0.182686	0.751043	0.161168	0.105531	0.136345	0.547933	0.11708	0.0955183	0.0963858	0.227311	0.0797583	0.0259111	0.063978	0.132614	0.0470262	0.016778	0.0387482	0.0770697	0.14512	0.0651793	2.04036	0.881851
624.565	0.782048	644.766	1128.09	1.74961	181.136	1442.48	22.0615	0.184977	0.28689	0.236529	0	0				13.597	12.2481	0.320631	19.3835	0.243511	3.15334	0.357116	14.5495	0.42919	2.65937	0.479166	0.66782	0.618352	2.51678	0.540081	0.383515	0.495498	2.06718	0.441705	0.395908	0.399503	1.0673	0.37449	0.132199	0.326416	0.809832	0.287175	0.109707	0.253364	0.368979	0.51496	0.32819	1.47729	0.718588
624.905	0.574309	816.144	298.493	0.365736	37.8644	519.742	7.949	0.149533	0.183219	0.26037	0	0				6.94343	6.64336	0.17391	10.5549	0.1326	1.72293	0.195122	8.3684	0.246856	1.44949	0.261169	0.343154	0.317735	1.45895	0.313079	0.206835	0.267229	1.19291	0.254896	0.226724	0.228783	0.578259	0.202898	0.0746988	0.184441	0.436155	0.154665	0.0593147	0.136986	0.205296	0.282822	0.181554	1.46218	0.718635
625.085	1.77841	532.468	454.653	0.85386	88.3996	255.651	3.90996	0.327795	0.615614	0.184319	0	0				27.0844	24.4775	0.640772	44.006	0.552839	7.03679	0.796919	34.487	1.01731	6.55691	1.18143	1.57374	1.45716	6.37392	1.36779	0.906695	1.17144	4.92375	1.05208	0.924015	0.932407	2.19035	0.768542	0.253564	0.626084	1.38436	0.490907	0.183854	0.424605	0.818335	1.24598	0.648509	1.69886	0.769066
625.32	0.643141	705.651	128.823	0.18256	18.9003	200.304	3.06347	0.302513	0.428701	0.470369	0	0				4.14933	3.55774	0.0931347	6.13037	0.0770147	1.06248	0.120326	5.07491	0.149702	0.972295	0.175188	0.234836	0.217441	0.939184	0.201542	0.128469	0.16598	0.695929	0.148703	0.133533	0.134746	0.338577	0.118799	0.0396721	0.0979558	0.22922	0.0812838	0.030826	0.0711917	0.121054	0.181771	0.100795	1.63868	0.721581
625.49	0.0581928		1016.27			17463.9	267.095	0.12826		2.20405						1.88372	1.93619	0.0506856	1.8632	0.023407	0.29803	0.033752	1.44076	0.0425004	0.195957	0.0353076	0.0516589	0.0478324	0.205428	0.0440832	0.0300992	0.0388878	0.171646	0.0366765	0.0397618	0.0401229	0.105565	0.0370404	0.0119022	0.0293882	0.0639563	0.0226796	0.00944538	0.0218138	0.0423127	0.0405575	0.030209	1.11849	0.554421
625.7	0.0581575	116.906	1185.72	10.1426	1050.05	20388.1	311.819	0.0249147	0.213118	0.4284	0	0				0.0702373	0.0880669	0.00230542	0.0317901	0.000399373	0.00817086	0.000925352	0.0358599	0.00105782	0.0148506	0.00267579	0.0084652	0.00783815	0.0387115	0.00830719	0.00114455	0.00147875	0.00678547	0.00144989	0.00148131	0.00149476	0.00552595	0.00193893	0.000603063	0.00148905	0.00380676	0.00134991	0.000704389	0.00162676					0.247231
626.49	0.0616893	6.31192	746.773	118.312	12248.7	12105.4	185.141	0.0289165	4.58125	0.468744	0.0224594	0.776698				0.0729898	0.0693928	0.00181656	0.0213737	0.000268514	0.00563949	0.000638674	0.0281075	0.000829129	0.0173272	0.00312201	0.0103306	0.00956539	0.0472273	0.0101346	0.000875788	0.00113151	0.0042031	0.000898098	0.00104905	0.00105858	0.00306111	0.00107407	0.000364076	0.000898952	0.00184421	0.000653975	0.000302572	0.00069878					0.218728
627.175	0.0752496	75.6933	715.81	9.45672	979.049	9512.48	145.485	0.0244192	0.322608	0.32451	0	0				0.0212223	0.0296582	0.000776393	0.00314096	3.94594e-05	0.00239687	0.000271447	0.00882588	0.00026035	0.0167719	0.00302196	0.00933377	0.00864238	0.05061	0.0108605	0.000409216	0.000528703	0.00238238	0.000509055	0.000702553	0.000708934	0.00129498	0.000454379	0.000255596	0.0006311	0.00125155	0.000443813	0.000273783	0.000632294					0.0753156
627.575	0.0652439		483.493			7410.56	113.338	0.0578771		0.887089						0.441062	0.380116	0.00995068	0.0929391	0.00116758	0.0322785	0.00365555	0.133307	0.00393236	0.0221305	0.00398748	0.00811893	0.00751753	0.0398195	0.00854495	0.00377057	0.00487153	0.0215532	0.00460539	0.00557088	0.00562147	0.0170526	0.00598338	0.00202402	0.00499758	0.00887339	0.00314659	0.00175554	0.00405436	0.0058462	0.00590538	0.00476068	1.1135	0.171624
628.335	0.0741665		414.293			5585.98	85.4327	0.0329003		0.443601						0.1221	0.113347	0.0029672	0.0127383	0.000160029	0.00972996	0.00110192	0.033281	0.00098174	0.022157	0.00399226	0.0108896	0.010083	0.0498062	0.010688	0.00156384	0.00202047	0.0105512	0.00225453	0.00289472	0.00292101	0.0077299	0.00271224	0.00134192	0.00331339	0.00802524	0.00284583	0.00109515	0.00252922	0.00168362	0.00580765	0.00286434	2.55396	0.0786555
628.585	0.0564135	71.7619	362.771	5.0552	523.362	6430.57	98.3498	0.0367579	0.512221	0.65158	0	0				0.484936	0.697346	0.0182551	0.512511	0.00643858	0.0922149	0.0104434	0.42466	0.0125268	0.0700364	0.0126192	0.0199857	0.0185053	0.0866441	0.0185932	0.00943321	0.0121876	0.0499544	0.010674	0.0110414	0.0111416	0.0294874	0.0103465	0.0037908	0.00936	0.0191834	0.00680262	0.00269203	0.00621715	0.0137418	0.0145159	0.00877357	1.28942	0.448705
635.4	0.0678055		352.049			5192.04	79.4076	0.0347339		0.512257						1.63965	2.00455	0.0524752	1.49682	0.0188043	0.256999	0.0291052	1.21917	0.0359637	0.158028	0.0284735	0.0392328	0.0363267	0.172393	0.0369942	0.0257477	0.0332657	0.146374	0.0312764	0.0320446	0.0323356	0.0897328	0.0314852	0.0111573	0.0275489	0.0623012	0.0220926	0.00835156	0.0192877	0.0391814	0.0332673	0.02655	1.01222	0.461001
643.535	0.0702176	194.462	438.246	2.25363	233.317	6241.25	95.4544	0.0619442	0.318541	0.882175	0	0				0.509993	0.554928	0.0145269	0.222701	0.00279775	0.0450496	0.00510188	0.201653	0.00594845	0.0288028	0.00518969	0.0120452	0.011153	0.0539045	0.0115675	0.00437056	0.00564672	0.0235924	0.00504112	0.00697135	0.00703466	0.0203586	0.00714337	0.00235372	0.00581165	0.0107164	0.00380014	0.00184679	0.0042651	0.00852575	0.00771959	0.00561098	1.09213	0.285066
[truncated: 5 more columns]

## Sheet: G49065
Bauer, K.W., et al., 2021, Pulsed volcanism and rapid oceanic deoxygenation during Oceanic Anoxic Event 1a: Geology, v. 49, https://doi.org/10.1130/G49065.1
